# Supplementary material for: Farming system context drives the value of deep wheat roots in semi-arid environments
Source: PubMed Central journal article supplement (PMC4896360; doi:10.1093/jxb/erw093), 2016-03-14
Supplement: supp_erw093_supplementary_table_S1.pdf [file supp_erw093_supplementary_table_S1.pdf]

**Supplementary Table 1.** Values of several soil characteristics and APSIM parameters (defined in Keating *et al.*, 2003) used in the simulation studies.

| Location <sup>A</sup>              | APSIM soil description         | diffus_const,<br>diffus_slope <sup>B</sup> | U, Cona <sup>C</sup>                 | Total C (0-0.1 m)<br>(%) | C:N ratio<br>(0-0.1 m) | BOM <sup>D</sup> station<br>number |
|------------------------------------|--------------------------------|--------------------------------------------|--------------------------------------|--------------------------|------------------------|------------------------------------|
| Wongan Hills, WA                   | Buntine No 424 <sup>E</sup>    | 220 ,22                                    | 2, 2 (Apr-Nov)<br>6, 3.5 (Dec-Mar)   | 0.52                     | 13                     | 8138                               |
| Dalby, QLD                         | Macalister No 026 <sup>E</sup> | 40, 16                                     | 4, 2.5 (Apr-Oct)<br>6, 3.5 (Nov-Mar) | 1.04                     | 12                     | 41023                              |
| Cootamundra, NSW<br>Ardlethan, NSW | Lilley and Kirkegaard (2007)   | 44, 16                                     | 2, 2 (May-Oct)<br>6, 3.5 (Nov-Apr)   | 0.83                     | 8                      | C: 73016<br>A: 74000               |
| Harden, NSW                        | Lilley <i>et al.</i> (2004)    | 88, 35.4                                   | 2, 2 (May-Oct)<br>6, 3.5 (Nov-Apr)   | 1.30                     | 10.8                   | 73009                              |
| Paskeville, SA                     | Kulpara No CY024 <sup>E</sup>  | 88, 35                                     | 2, 2 (Apr-Oct)<br>6, 3.5 (Nov-Mar)   | 1.40                     | 12.5                   | 22012                              |
| Esperance, WA                      | Gibson No 455 <sup>E</sup>     | 250, 25                                    | 2, 2 (Apr-Oct)<br>6, 3.5 (Nov-Mar)   | 0.90                     | 14.5                   | 9631                               |
| Birchip, VIC                       | Jil Jil No 727 <sup>E</sup>    | 40, 16                                     | 2, 2 (Apr-Oct)<br>6, 3.5 (Nov-Mar)   | 1.30                     | 12                     | 77007                              |

<sup>A</sup> Australian states listed are: QLD – Queensland; NSW – New South Wales; VIC – Victoria; WA – Western Australia.

<sup>B</sup> Diffus\_const and diffus\_slope are parameters defining diffusivity of unsaturated water flow between soil layers.

<sup>C</sup> U and cona are parameters of a two stage soil evaporation rate.

<sup>D</sup> BOM – Australian Bureau of Meteorology <http://www.bom.gov.au>

<sup>A,B</sup> Further details at <https://www.apsim.info/Documentation/Model,CropandSoil/SoilModulesDocumentation/SoilWat.aspx>

<sup>E</sup> Further details at <https://www.apsim.info/Products/APSoil.aspx>
